# Supplementary material for: Enhanced axonal regeneration of ALS patient iPSC-derived motor neurons harboring SOD1A4V mutation
Source: PubMed Central journal article supplement (PMC10076424; doi:10.1038/s41598-023-31720-7), 2023-04-05
Supplement: 41598_2023_31720_MOESM1_ESM.pdf [file 41598_2023_31720_MOESM1_ESM.pdf]

## ENHANCED AXONAL REGENERATION OF ALS PATIENT IPSC-DERIVED MOTOR NEURONS HARBORING SOD1<sup>A4V</sup> MUTATION

**Authors:** Katherine L. Marshall, Labchan Rajbhandari, Arun Venkatesan, Nicholas J. Maragakis, Mohamed H. Farah

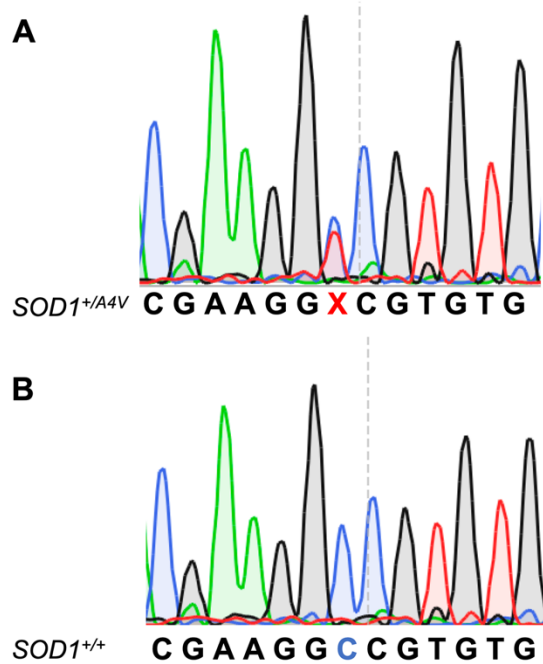

**Supplementary figure 1:** Verification of *SOD1*<sup>+/<sup>+</sup> and *SOD1*<sup>+/<sup>A4V</sup> genotypes following axotomy. DNA was extracted from fixed neurons from three distinct platings in microfluidic devices and submitted for sanger sequencing. **(A)** Representative sequencing chromatogram of Exon 1 of *SOD1* in *SOD1*<sup>+/<sup>A4V</sup> neurons. **(B)** Representative sequencing chromatogram of Exon 1 of *SOD1* in *SOD1*<sup>+/<sup>+</sup> isogenic corrected control neurons.</sup></sup></sup></sup>

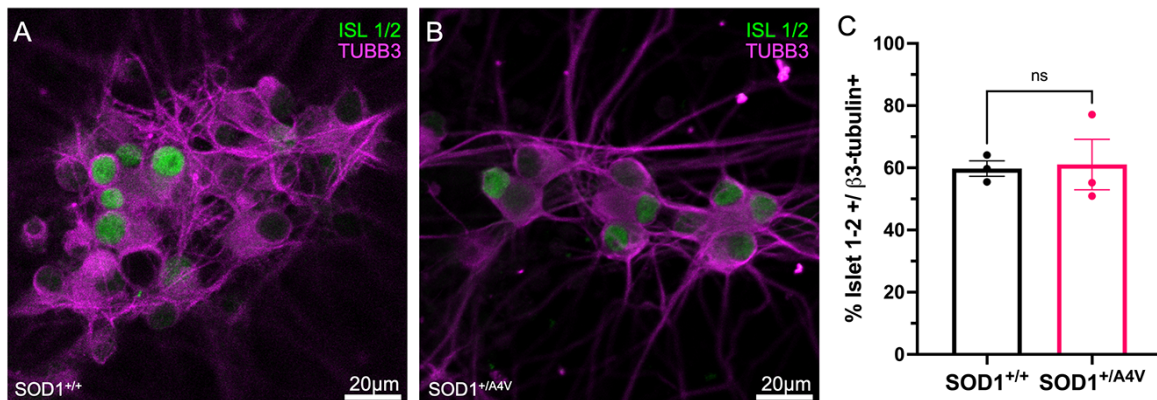

**Supplementary figure 2:** Efficiency of motor neuron differentiation for *SOD1*<sup>+/<sup>+</sup> and *SOD1*<sup>+/<sup>A4V</sup> is not different. **(A-B)** Representative images of **(A)** *SOD1*<sup>+/<sup>+</sup> and **(B)** *SOD1*<sup>+/<sup>A4V</sup> hiPSC-MNs immunostained for Islet 1/2 and β3-tubulin. Scale bars= 20μm. **(C)** Percentage of ISL1/2+ hiPSC-MNs (TUBB3+) for *SOD1*<sup>+/<sup>+</sup> (n=3 devices) and *SOD1*<sup>+/<sup>A4V</sup> (n=3 devices) following motor neuron differentiation for two independent platings from each line. Bars represent mean ± SEM. ns (not statistically significantly different) indicates p = 0.89.</sup></sup></sup></sup></sup></sup>

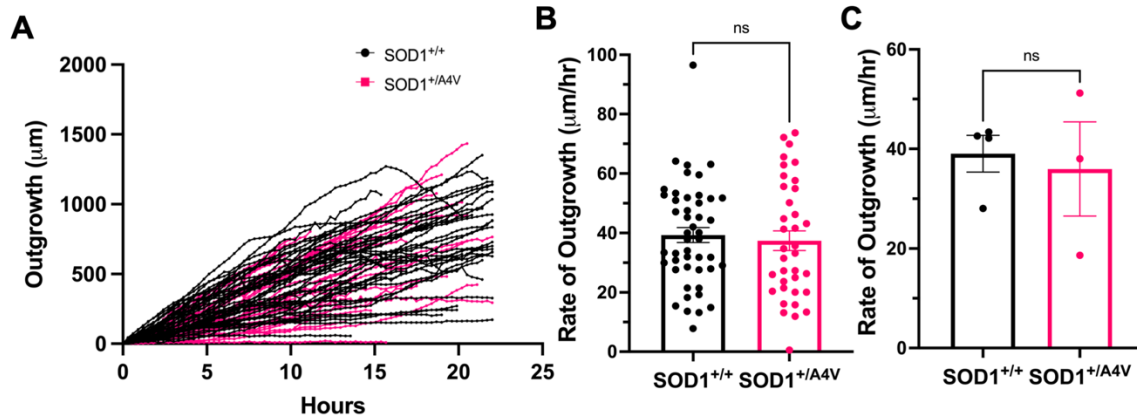

**Supplementary figure 3:** No significant difference in initial axonal outgrowth between SOD1<sup>+/+</sup> and SOD1<sup>+/A4V</sup>. 24 hours after plating motor neurons in to the cell body compartment, live-cell imaging was used to track initial outgrowth of axons emerging from the channels into the axonal compartments to generate time-lapse video from which axons were tracked. **(A)** Outgrowth distance of individual axons following axotomy. Each line represents an individual axon. n= 3 sectors (33 axons) SOD1<sup>+/A4V</sup> and n= 4 sectors (47 axons) SOD1<sup>+/+</sup>. **(B)** Average outgrowth speed. Each point represents the speed of an individual axon. **(C)** Average outgrowth speed. Each point represents the mean axon outgrowth speed from an individual sector (10-13 axons per sector).
